# Supplementary material for: Developing and evaluating cybersecurity competencies for students in computing programs
Source: PeerJ Comput Sci. 2022 Jan 17;8:e827. doi: 10.7717/peerj-cs.827 (PMC8771794; doi:10.7717/peerj-cs.827)
Supplement: Supplemental Information 2 [file peerj-cs-08-827-s002.xlsx]

## Sheet: Criteria weight
Linguistic terms
Very low (VL)
Low (L)
Medium low (ML)			Criteria weight matrix by all three experts.
Medium (M)
Medium high (MH)
High (H)
Very high (VH)
	Criteria	Sub-criteria	DM1	DM2	DM3
	Knowledge	Access control	VH	VH	H
		Antivirus software	MH	MH	M
		Cyber threats and vulnerabilities	VH	VH	VH
		Email encryption and use	H	VH	VH
		File permissions	ML	M	M
		Incident reporting	VH	H	VH
		Information privacy	H	MH	MH
		Strong password and reuse	H	H	H
		Phishing	VH	VH	VH
		Policy compliance	VH	H	VH
		Sensitive information	H	M	M
	Skills	Preventing unauthorized access	VH	MH	H
		Using an antivirus application	M	MH	MH
		Managing cookie settings and usage	MH	MH	MH
		Using incident reporting	H	VH	H
		Avoiding suspicious and malicious sites	M	MH	M
		Securely operating mobile devices	MH	H	MH
		Creating and using unique passwords	VH	VH	VH
		Avoiding a phishing attempt	VH	H	VH
		Securely using social networking sites	M	ML	M
		Physically protecting information systems	M	MH	VH
		Using encryption	H	M	M
	Abilities	Oral comprehension	M	ML	ML
		Near vision	ML	ML	ML
		Problem sensitivity	L	L	VL
		Written communication	ML	M	M
		Written expression	MH	H	MH

## Sheet:  evaluation matrix
Linguistic terms
Very poor (VP)
Poor (P)
Medium poor (MP)		Alternative evaluation matrix
Fair (F)
Medium good (MG)
Good (G)
Very good (VG)
		Criteria	Sub-criteria	Alternatives	DM1	DM2	DM3
		Knowledge	Access control	Uni. A	MG	MG	MG
				Uni. B	G	MG	MG
				Uni. C	VG	MG	MG
			Antivirus software	Uni. A	F	F	F
				Uni. B	MG	MG	G
				Uni. C	VG	VG	G
			Cyber threats and vulnerabilities	Uni. A	VG	G	VG
				Uni. B	VG	VG	VG
				Uni. C	VG	G	G
			Email encryption and use	Uni. A	VG	VG	VG
				Uni. B	MG	G	MG
				Uni. C	F	F	G
			File permissions	Uni. A	P	MP	P
				Uni. B	F	MG	MG
				Uni. C	VG	VG	VG
			Incident reporting	Uni. A	MG	MG	MG
				Uni. B	G	MG	MG
				Uni. C	VG	MG	MG
			Information privacy	Uni. A	F	F	F
				Uni. B	MG	MG	G
				Uni. C	VG	VG	G
			Strong password and reuse	Uni. A	G	G	G
				Uni. B	MG	MG	MG
				Uni. C	MG	F	G
			Phishing	Uni. A	G	G	MG
				Uni. B	MG	MG	G
				Uni. C	G	G	G
			Policy compliance	Uni. A	G	VG	VG
				Uni. B	MG	G	MG
				Uni. C	MP	F	G
			Sensitive information	Uni. A	MG	MP	P
				Uni. B	VG	G	G
				Uni. C	VG	G	G
		Skills	Preventing unauthorized access	Uni. A	VG	VG	VG
				Uni. B	MP	MP	P
				Uni. C	F	F	F
			Using an antivirus application	Uni. A	VG	VG	VG
				Uni. B	F	MP	P
				Uni. C	F	F	MP
			Managing cookie settings and usage	Uni. A	VG	VG	G
				Uni. B	MP	P	VP
				Uni. C	MP	P	VP
			Using incident reporting	Uni. A	G	VG	G
				Uni. B	P	P	VG
				Uni. C	MP	MG	MP
			Avoiding suspicious and malicious sites	Uni. A	G	VG	F
				Uni. B	VP	VP	VG
				Uni. C	P	P	MP
			Securely operating mobile devices	Uni. A	G	G	F
				Uni. B	P	VP	VG
				Uni. C	P	P	G
			Using strong and unique passwords	Uni. A	G	G	G
				Uni. B	VG	VG	G
				Uni. C	VG	VG	MG
			Avoiding a phishing attempt	Uni. A	MG	MP	G
				Uni. B	F	F	MG
				Uni. C	G	G	G
			Securely using social networking sites	Uni. A	MG	MG	G
				Uni. B	G	G	VG
				Uni. C	G	MG	MG
			Physically protecting information systems	Uni. A	VG	MG	G
				Uni. B	G	G	P
				Uni. C	MG	MG	MG
			Using encryption	Uni. A	G	G	MG
				Uni. B	VG	G	G
				Uni. C	MG	MG	G
		Abilities	Oral comprehension	Uni. A	P	MP	MG
				Uni. B	G	MG	MP
				Uni. C	G	G	F
			Near vision	Uni. A	P	MP	MG
				Uni. B	G	MG	MP
				Uni. C	G	G	F
			Problem sensitivity	Uni. A	MP	MP	P
				Uni. B	VP	VP	VP
				Uni. C	P	VP	P
			Written communication	Uni. A	MG	G	MG
				Uni. B	MP	P	MP
				Uni. C	P	MP	F
			Written expression	Uni. A	G	MG	G
				Uni. B	VP	VP	MP
				Uni. C	P	MP	F
